# Supplementary material for: Expression of Herpes Simplex Virus Thymidine Kinase/Ganciclovir by RNA Trans-Splicing Induces Selective Killing of HIV-Producing Cells
Source: PubMed Central journal article supplement (PMC5415956; doi:10.1016/j.omtn.2017.03.004), 2017-03-14
Supplement: mmc1.pdf [file mmc1.pdf]

OMTN, Volume 7

## **Supplemental Information**

### **Expression of Herpes Simplex Virus Thymidine Kinase/Ganciclovir by RNA *Trans*-Splicing Induces Selective Killing of HIV-Producing Cells**

**Carin K. Ingemarsdotter, Sushmita Poddar, Sarah Mercier, Volker Patzel, and Andrew M.L.  
Lever**

# Supplementary figure 1.

a

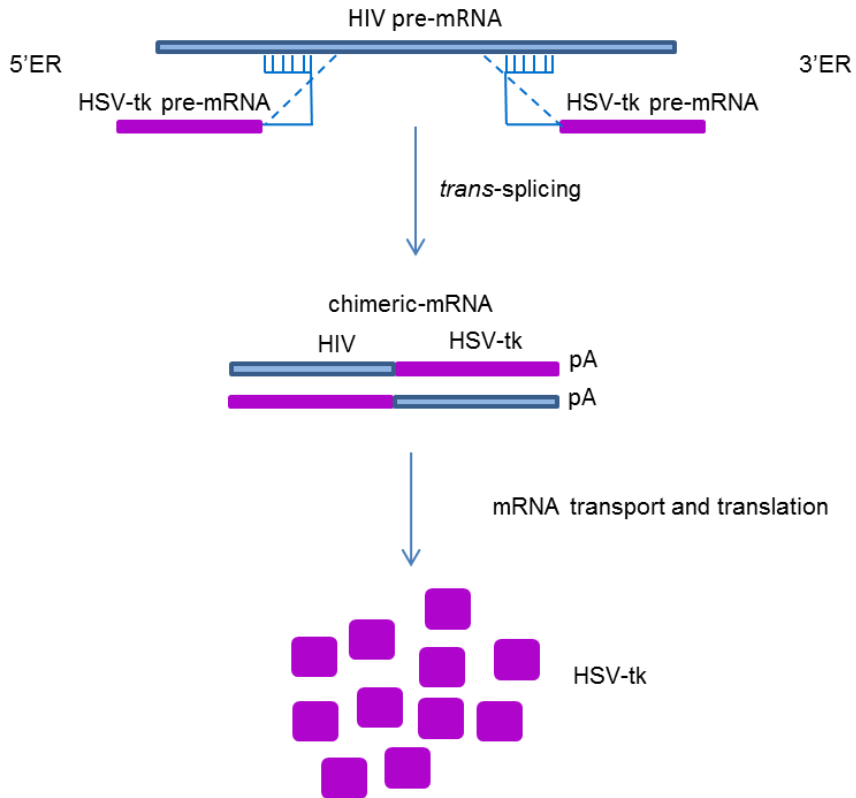

b

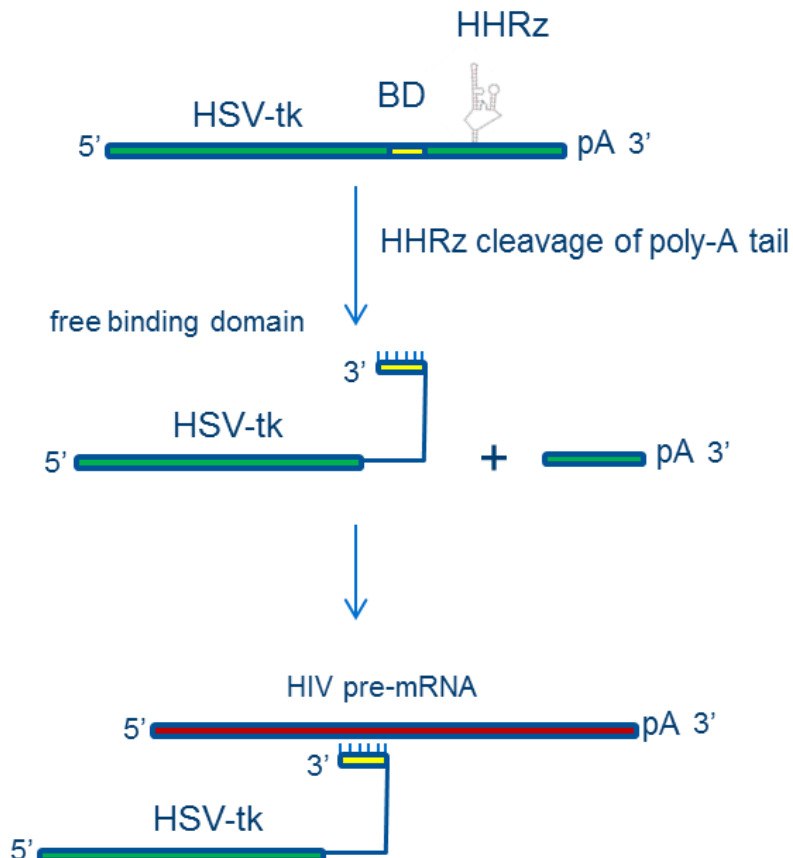

Supplementary figure 1. Schematic diagram of 3'exon replacement and 5'exon replacement.

(a) RNA *trans*-splicing between HSV-tk pre-mRNA (purple) by 5' exon replacement (5'ER) or 3' exon replacement (3'ER) to HIV pre-mRNA (blue). RNA *trans*-splicing lead to the generation of a chimeric RNA transcript that will be transported to the cytoplasm where it will be translated and processed into HSV-tk protein.

(b) Schematic diagram of HHRz self-cleavage. The HHRz<sup>1</sup> sequence is located downstream of HSV-tk and the binding domain (yellow). HHRz RNA self-cleavage will lead to the removal of the polyA tail and exposure of the binding domain. The HSV-tk *trans*-splicing molecule (green) will anneal to the HIV pre-mRNA (red) via the binding domain prior to the RNA *trans*-splicing reaction as shown in Supplementary figure 1a.

1. Saksmerprome, V, Roychowdhury-Saha, M, Jayasena, S, Khvorova, A, Burke, DH (2004). Artificial tertiary motifs stabilize trans-cleaving hammerhead ribozymes under conditions of submillimolar divalent ions and high temperatures. *RNA* **10**: 1916-1924.

## Supplementary figure 2.

a

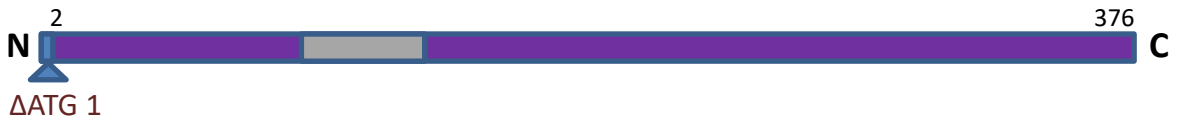

b

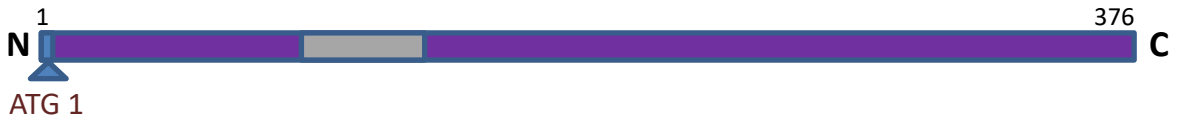

Supplementary figure 2. Diagrams of HSV-tk. (a) Diagram of HSV-tk for 3' exon replacement. The first ATG of HSV-tk is deleted and HSV-tk starts at amino acid 2. An introduced mini-intron is shown in grey. (b) Diagram of HSV-tk for 5' exon replacement. The first ATG is present at amino acid position 1. The mini intron is outlined in grey as above. The numbering refers to amino acid numbering in HSV-tk.

### Supplementary figure 3.

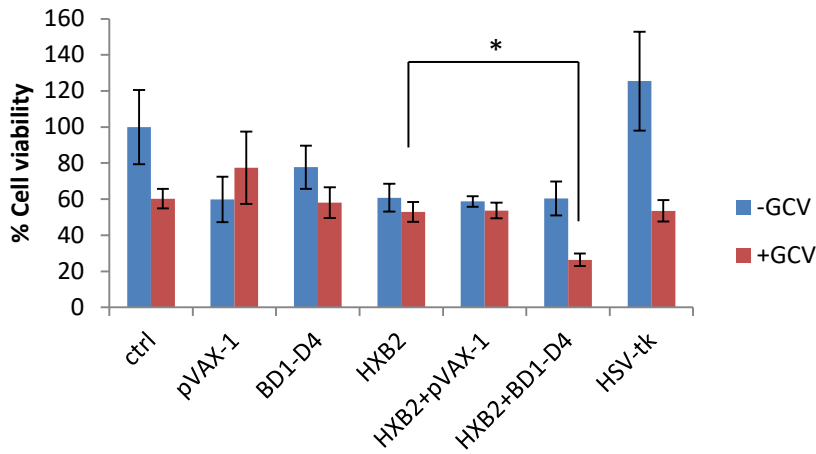

Supplementary figure 3. Cell viability after RNA *trans*-splicing using HXB2 as HIV-1 target strain.

Cell viability was assessed by MTT assay. 293T cells were sequentially transfected with HXB2 (SVC21) and RNA *trans*-splicing construct (BD1-D4) twenty-four hours apart, treated with 100 $\mu$ M GCV on day 1 and 2 after transfection with BD1-D4 (n=8 wells per experimental condition). Cell viability was assessed on day 8, five days post-transfection with the RNA *trans*-splicing construct. Error bars represent the standard deviation (STDEV) of the average % cell viability. P values (two-tailed) are shown for t-test: two sample assuming unequal variances; \*p $\leq$ 0.05)

## Supplementary Table 1.

a

| Binding domain               | Splice site target | HIV transcript target        | HIV-1 pNL4.3 BD target seq. | HIV splice site location (end of exon) | Nts between binding domain and splice site |
|------------------------------|--------------------|------------------------------|-----------------------------|----------------------------------------|--------------------------------------------|
| BD-D1a                       | D1a                | Cryptic splice site          | 4781-4830                   | 4721                                   | 59                                         |
| BD1-D4                       | D4                 | Vpr, Tat, Rev, Nef, Novel    | 6141-6204                   | 6044                                   | 96                                         |
| BD2-D4                       | D4                 | Vpr, Tat, Rev, Nef, Novel    | 6194-6240                   | 6044                                   | 149                                        |
| BD-LD1/2,env<br>BD-LD1/2,nef | LD1/LD2            | Computer algorithm predicted | 9302-9339                   | LD1-9242,<br>LD2-9287                  | 59 (LD1)<br>14 (LD2)                       |

b

| Binding domain | Splice site target | HIV transcript target        | HIV-1 pNL4.3 BD target seq. | HIV splice site location (end of intron) | Nts between binding domain and splice site |
|----------------|--------------------|------------------------------|-----------------------------|------------------------------------------|--------------------------------------------|
| BD-EA1/2       | EA1/EA2            | Computer algorithm predicted | 1773-1820                   | EA1-2139,<br>EA2-2258                    | EA1-318,<br>EA2-437                        |
| BD-A3          | A3                 | Tat                          | 4780-4829                   | 5776                                     | 946                                        |
| BD-A5          | A5                 | Env/Vpu<br>Rev<br>Nef        | 5899-5947                   | 5975                                     | 27                                         |
| BD-A7          | A7                 | Vpr, Tat, Rev, Nef, Novel    | 8188-8235                   | 8368                                     | 132                                        |
| BD-A8          | A8                 | Novel<br>Cryptic             | 8896-8943                   | 9161                                     | 217                                        |

Supplementary Table 1. Table of RNA *trans*-splicing constructs with target information for 3'exon replacement in a, and 5'exon replacement in b.

## Supplementary Table 2.

| Number of HIV-1 sequences (filtered web)                        | Binding domain | HIV-1 target coordinates in HXB2 | Number of mutations in max % of sequences | Max % of sequences |
|-----------------------------------------------------------------|----------------|----------------------------------|-------------------------------------------|--------------------|
|                                                                 | 3944 BD1-D4    | Vpu 84-147                       | 30                                        | 12.75              |
|                                                                 | 3944 BD2-D4    | Vpu 137-183                      | 32                                        | 21.6               |
|                                                                 | 4632 BD-A7     | Env 1974-2021                    | 7                                         | 14.79              |
|                                                                 | 2445 BD-A3     | Pol 551-600                      | 6                                         | 27.55              |
|                                                                 | 2712 BD-A5     | Tat 70-118                       | 8                                         | 19.72              |
|                                                                 | 4553 BD-A8     | Nef 110-157                      | 33                                        | 9.92               |
| HIV-1 sequences (major subtypes A, B, C, D, F, G, CRF01, CRF02) | Binding domain | HIV-1 target coordinates in HXB2 | Number of mutations in max % of sequences | Max % of sequences |
|                                                                 | 2960 BD1-D4    | Vpu 84-147                       | 23                                        | 10.13              |
|                                                                 | 2960 BD2-D4    | Vpu 137-183                      | 30                                        | 22.62              |
|                                                                 | 3794 BD-A7     | Env 1974-2021                    | 5                                         | 15.43              |
|                                                                 | 1841 BD-A3     | Pol 551-600                      | 6                                         | 30.17              |
|                                                                 | 1885 BD-A5     | Tat 70-118                       | 8                                         | 18.77              |
|                                                                 | BD-A8          | Nef 110-157                      | 33                                        | 12.52              |
| HIV-1 sequences (Subtype B)                                     | Binding domain | HIV-1 target coordinates in HXB2 | Number of mutations in max % of sequences | Max % of sequences |
|                                                                 | 1341 BD1-D4    | Vpu 84-147                       | 7                                         | 20.44              |
|                                                                 | 1341 BD2-D4    | Vpu 137-183                      | 27                                        | 20.16              |
|                                                                 | 1563 BD-A7     | Env 1974-2021                    | 3                                         | 19.25              |
|                                                                 | 773 BD-A3      | Pol 551-600                      | 4                                         | 34.44              |
|                                                                 | 802 BD-A5      | Tat 70-118                       | 4                                         | 21                 |
|                                                                 | 1627 BD-A8     | Nef 110-157                      | 9                                         | 14.55              |

Supplementary Table 2. Summary of sequence variant analysis of HIV-1 binding domain target sequences. Sequence variants of HIV-1 binding domain target sequences were analysed using AnalyzeAlign as described in Material and Methods.



## Supplementary Table 3.

| Name of primer        | F or R | Primer sequence                         | Usage                                                                             |
|-----------------------|--------|-----------------------------------------|-----------------------------------------------------------------------------------|
| 3'ER reverse          | R      | GGTTCTCCTCCAGTCTC                       | to detect t.s junction by conventional PCR/sequencing                             |
| 5'ER forward          | F      | TACCGACGATCTGCGAC                       | to detect t.s junction by conventional PCR/sequencing                             |
| 5'ER BD-A3 reverse    | R      | TCGAGTAACGCCTATTCTG                     | to detect t.s junction by conventional PCR                                        |
| 5'ER BD-A7 reverse    | R      | ACCAATATTTGAGGGCTTC                     | to detect t.s junction by conventional PCR/sequencing                             |
| 5'ER BD-A8 reverse    | R      | TTATCTGGCTCAACTGGTACTA                  | to detect t.s junction by conventional PCR/sequencing                             |
| 5'ER BD-A5 reverse    | R      | TGCTTTGATAGAGAAGCTTGATGAG               | to detect t.s junction by conventional PCR/sequencing                             |
| 3'ER BD1/2-D4 forward | F      | GAGACAGCGACGAAGAGCTCAT                  | to detect RNA trans-splicing transcripts by qRT-PCR, conventional PCR, sequencing |
| 3'ER reverse          | R      | CAGGGTTCTCCTCACGTCTC                    | to detect RNA trans-splicing transcripts by qRT-PCR                               |
| 5'ER BD-A7 reverse    | R      | CACCTTCTTCTTATTCTTCGG                   | to detect RNA trans-splicing transcripts by qRT-PCR                               |
| 5'ER BD-A3 reverse    | R      | CCTCTGTCGAGTAACGCCTATTCT                | to detect RNA trans-splicing transcripts by qRT-PCR                               |
| 5'ER BD-A5 reverse    | R      | AGTCTGACTGTTCTGATGAGCTCTTC              | to detect RNA trans-splicing transcripts by qRT-PCR                               |
| 5'ER BD-A8 reverse    | R      | TCTACCTTATCTGGCTCAACTGGTACTA            | to detect RNA trans-splicing transcripts by qRT-PCR                               |
| 5'ER forward          | F      | TGGCGGCACGTTTG                          | to detect RNA trans-splicing transcripts by qRT-PCR                               |
| 3'ER probe            | Probe  | 6FAM-GAAGCGGAGCTACTAACTCAGCCTGCTGA-BHQ1 | to detect RNA trans-splicing transcripts by qRT-PCR                               |
| 5'ER probe            | Probe  | 6FAM-CGGGAGATGGGGAGGGCGAA-BHQ1          | to detect RNA trans-splicing transcripts by qRT-PCR                               |

Supplementary Table 3. Primers used for PCR, qRT-PCR and sequencing.
